# Supplementary material for: Plasmodium Condensin Core Subunits SMC2/SMC4 Mediate Atypical Mitosis and Are Essential for Parasite Proliferation and Transmission
Source: PubMed Central journal article supplement (PMC7016506; doi:10.1016/j.celrep.2020.01.033), 2020-02-11
Supplement: mmc6.pdf [file mmc6.pdf]

**Data S1:** Related to Figure 4. Protein sequences used for phylogenetic analysis. Protein sequences can be retrieved from EupathDB (<https://eupathdb.org/eupathdb/>) and NCBI (<https://www.ncbi.nlm.nih.gov/>) database.

>sp|G5EGE9|DPY26\_CAEL Condensin complex subunit dpy-26 (Kleisin Iy) OS=Caenorhabditis elegans OX=6239 GN=dpy-26 PE=1 SV=1

MDVPSSSNVTGRRKRQVLDDDEDDGFRSTPLRKVRGTTKIRPADVVPETIMTKIGAHIDDIVNKKKVG  
ELNCFEYKSPLEIHTIEDMIKAKASIQEMAVVLEGAQCIIGYRVDRLHHDVVRQIDSALSSGTVMRDSNG  
EEIHLTLESRKAKKKMAVVDGMNGMLDFLNNMDDALTTTELDADNDKNWKEDEENIAGEPRIDFKAN  
SKDVDAFLQRDIFPEKLIYALSIRATDLRADLLSDVSNYISADDTAHLKLDANIDWLRANPTFQKATKG  
SVCNSSNSFHSLNYYGIHSPDGRTLMLHNRIADKNADDRFFTSVSVSLVKNTRALLTNSLDKKPRIL  
DNYLMLEVKDRPVIGRYKIMSKDVKKSTLPLAESSREKDLANLTF AEMNHRPSNLDMTVAGASDMSM  
LPGNQGLPLAQGENDETIALDRLTPPLQSSVSQKASDEYVLPPEANDLDEHLIGKLPNEMDQTL  
ANMFDKKLEVFNTSDTLESK/VKNGIRAEWGEDDEAIMKNDTKHPRQAGIEGWIKATDAWTNYDV  
VKMNVNREARSQLDENAIDEQESYRNMVPEIGKNLFLVKSDDYMNNYPGDRPADFTVNDEVSDVMK  
MWSGEDSTAEDDVPLEQIQQEIREQVQQQDVMPIEEMDYDAGGAAFDVFDDRLAAPVEVEEM  
EGDNNRNDGRVADILFNEQMDETEVEERNEQDVQRELEDIALAADEVAELMTSAPPPQLVGP  
SAEM REEIQNIGKNDNAHWVPPVVGDERQAAVTAQRKRREKKAKSRKATVEDFVHYFRDIPDDEIEREITA  
AKCSKIADEKSTFLSEQQLYLPTLGIENKPHVAFEMGLLGNMFFKSYGKIRLERVKNQKAEQDLFI  
DEARGNKDSDCLNWLLSFGFRMENPEPITGSDSDENLRTAVEQPFDDDFANDYYDEDRYDPN  
YE QQLAAQMGPDQMQRKLALTASHINQMFPNIHRSKRYGGEYGDSDDEFDDSFDRQSIQAKNLDA  
AKHK KCLAEILKTDLSMPSIQYVLEQLTSNQTLMNNTTIRAADDRNETGRPATPTMEADKTLTSV  
FDYRS PNKSNHDVNETMKALTEMPDYQAADERPNNQPTTSTYGTANTENRKVHNGCHTLLSL  
LMSPSRM GETVRPSSIVSFLHIANENNLQIVQDRSKRSWMSDFIVLNSSESLPRGLKMGRIEDQ  
DEFWKRTQDP DAIEGTASDANNVFSNLMRRPKAVPVRKGRGAGGQPTTSDLGAIVVEEEMEE

>sp|Q15003|CND2\_HUMAN Condensin complex subunit 2 ((Kleisin Iy)) OS=Homo sapiens OX=9606 GN=NCAPH PE=1 SV=3

MGPPGPALPATMNNSSSETRGHPHSASSPSEVFPMPLPRKAPLNIPGTPVLEDFPQNDDEKERLQ  
RRRSRVFDLQFSTDSPRLLASPSSRSIDISATIPKFTNTQITEHYSTCIKLSTENKITTNAFGLHLIDFM  
SEILKQKDTEPTNFKVAAGTLDASTKIYAVRVDAVHADVYRVLGGGLGKDAPSLEEVEGHVADGSATE  
MGTTKKAVKPKKKHLHRTIEQNINNLNVSEADRKCEIDPMFQKTAASFDECSTAGVFLSTLHCQDYRS  
ELLFPSDVQTLSTGEPELPELGCVEMTDLKAPLQCAEDRQICPSLAGFQFTQWDSETHNESVSAL  
VDKFKKNDQVFDINAEVDESDCGDFPDGSLGDDFDANDEPDHTAVGDHEEFRSWKEPCQVQSCQE  
EMISLGDGDIRTMCPLLSMKPGEYSYFSPRTMSMWAGPDHWRFRPRRKQDAPSQSENKKKSTKKD  
FEIDFEDDIDFDVYFRKTKAATILTKSTLENQNWRAATLPTDFNYNVDTLVQLHLKPGTRLLKMAQGH  
R VETEHEEIEDYDYNPNPNTSNFCPGLQAADSDDLDLDFVGPVGNLSPYPCHPPKTAQQNGD  
TPEAQLDITTYGESNLVAEPQKVNKIEIHAKTAKKMDMKLQSMWSLLTALSGKEADAEANHRE  
AGKEAALAEVADEKMLSGLTKDLQRSLPPVMAQNLISPLAFACLLHLANEKNLKLKLEGTEDLSDVLRQ  
GD

>sp|Q9Y7R3|CND2\_SCHPO Condensin complex subunit 2 ((Kleisin Iy)) OS=Schizosaccharomyces pombe (strain 972 / ATCC 24843) OX=284812 GN=cnd2 PE=1 SV=1

MKRASLGGHAPVSLPSLNDDALEKKRAKENSARKQRELRRSSALHSITPRRESLNNSSPFNSSHQVPV  
LSNFEEWIKLATDNKINSTNTWNFALIDYFHDMSLLRDGEDINFQKASCTLDGCVKIYTSRIDS  
VATET GKLLSGLANDSKVLQQTEEGEDAENDDLDLQKKKERKRAQRSVKTLVKDFESIRAKKFELECS  
FDPL FKKMCADFEDGAKGLLMNHLCDVQHGRIVFDSSDVIKDLNKDVEAESQEA  
VVAAPIESHDTEMT NVHDNISRETLNGIYKCYFTDIDQLTICPSLQGFEDSKGNLDV  
SLLKSLSDVNMITTTSLVDNTMEKT DADAASLSSDSGEEGHIVHALEMAYDEENPYVDV  
VPKAMDESENPFGVDTEVNMADGSTMNE NYSIISTAAANGVYEFDKSMKKNWAGPEHW  
RIQALRKNINASTVFNSNTAESSDNVSRSLSTE RKKRRELDNAIDFLQEVDVEALFTPAT  
SSLKLPKSHWKRHNRCLLPDDYQYDSKRLQLFLKPKMSVL PNADGEGQLQLNKALD  
DENDLDGIQPHGFSDGSDNVDEGIPPYGFSDSDSPKQTPLTTPSSSGF GDNLLTARLAK  
PDMNLYAKRAKKVDVRLKEKLWKCLDLENTIKENSINSHIEGSEMESEETNMPVK  
SFFSTVNQLEETYEKELKDISTSFAGICVLHLANEHNLELTSNEDFSDVFIRPGPNLTTLE  
AENDV

>sp|P38170|CND2\_YEAST Condensin complex subunit 2 (Kleisin Iy) OS=Saccharomyces cerevisiae (strain ATCC 204508 / S288c) OX=559292 GN=BRN1 PE=1 SV=3

MTTQLRYENNDDEERVEYNLFTNRSTMMANFEEWIKMATDNKINSRNSWNFALIDYFYDLVDLKDGE  
NNINFQKASATLDGCIKIYSSRVDSVTTETGKLLSGLAQRKTNGASNGDDSNNGGNGEGLGGDSDEAN  
IEIDPLTGMPISNDPDVNNTRRRVYNRVLETTLVEFETIKMKELDQELIIDPLFKKALVDFDEGGAKSLLL  
NTLNIDNTARVIFDASIKDTQNVGQKLRKEEELIERDSLVDENEPSQSLISTRNDSTVNDVISAP  
SMEDEILSLGMDFIKFDQIAVCEISGSIEQLRNVVEDINQAKDFIENVNRRFDNFLTEEELQAAVDPNAE  
DDSDGDFMGMQQELCYPDENHDNTSHDEQDDDNVNSTTGSIFEKDL MAYFDENLNRNWRGREHW  
KVRNFKKANLVNKESDLEETRRTTIGDTTDKNTTDDKSMDTKKKHKQKQVLEIDFFKTDDSFEDKVFA  
SKGRTKIDMPIKNRKNDTHYLLPDDFHSTDRITRLFIPGQKMSLFSHRKHTRGDVSSGLFEKSTVS  
ANHSNNDIPTIADEHFWADNYERKEQEEKEKEQSKEVGDVVGALDNPFEEDMDGVDFNQAFEGT  
DDNEEASVKLDLQDDEDHFKPIRENKVYTSRVSKKVDVRRLLKKNVWRSINNLIQEHDSRKNREQSSN  
DSEHTEDESTKELKFSDIIGISKMYSDDTLKDISTSFCFICLLHLANEHGLQITHTENYNLIVNYEDL  
ATTQAAS

>sp|Q8C156|CND2\_MOUSE Condensin complex subunit 2 (Kleisin I $\gamma$ ) OS=Mus musculus OX=10090  
GN=Ncaph PE=1 SV=1

MRIPRSETMNSSFLKARGQQDVLSSPLERVPPASRPGKAPLGTPTVLEDFPQNDDEKERMQRRR  
SRVFDLQFSTDSIHLASPNRNIDVSTTISKFTNTQITEHYSTCIKLSSENKITTKN AFLHLIDFMSEILKQ  
KDAEPTNFKVAAGTLDASTKIYAVRVD AVHADVYRVLVGGLGKDTTPPQGEESHSGDGTLETERTKKP  
AKPKKKQSKTIEQNLSNINVSEADGKCAVDPMFQKTAASFDECESTTG VFLSTLHCQDYRSELLFPSPD  
MQTLSSGEPELELPDLGFVDMTDLEASLQQCVEDRPLCPSLAGFQFTKWDSETHNESVSALVDKFKK  
NDQVFDINAEAEDEEDVPDGPLVEDFVDNDEPDL SAAGDHEEFRSWKELCQVQSNQEEVISLEDR  
DIQVMCSFLSMKPGEYSYFSPRTMKMWAGPDHWRFRPRPKQDATSCTEHKKKS AKKDFEINFDDDI  
DFDAYFQKTKAATILTKSTLENQNWKATTLPTDFHYETDNLIQLHLKPGKRSLKMDQDQKAKTEHYEE  
IEDYDYNPNPNDTSNYCPGLQAADSDYEEADDL FADPVGTLDES DPKTTQENGHISPENQGV DITTY  
QELNLVAEPQKVNKIEIHYAKTAKKMDMKLQKSMW SLLTKFSRKEADTEANHTESGQEGAPEEVAD  
EKKLSGLTKDLQTRLPLPLMAQNLSIPLAFACLLHLANEKNL KLEGTEDLSDVLVMQGD

>tr|P91663|P91663\_DROME Condensin complex subunit 2 (Kleisin I $\gamma$ ) OS=Drosophila melanogaster  
OX=7227 GN=barr PE=2 SV=1

MTLPRLETPLRRSAVGSYQEGVSRMLTPFNDDAEERREARRRRTLLQQHRSSTLESIEDNETIKNCL  
ELYNGNKVSKDNAWNLMMLIDSLANLLDHHHKRMSNFKMAGSSLEASSKVYGLRVD SIYLDAMRISAG  
LSARTLTDKQINAAEDDDGPQGEQATGEGQDSAQQA AKEAAPKPKRQKKPISTVTKNRETLNSRLDT  
APLQDPVFGKLNSTCGASINASNRLMHNILPSFDELRLRTTYNFWNSEESTE EVQDHTLNAEMEQ  
WPATSLMSTNLMRKLLPHAERSNLRPLHTGYIITSAPNPKSANEKAAEVVQDEDHDEGLDNADDVCV  
NKISMAFDINAECEPMPDL DGGPPPLVLEVDSNELEELTAE EQMVINNCRRLRKQTEFIEDLRPVDGNS  
KLEYSYRPM DQISQFWAGPSHWKFKRTRPRSTFSQTNGQVDTQPIRTQRAKKS AHLNANRRAKALD  
YGNVTENFFQQLD TTIRQRKANFQKKWDP RKLILPTKFELDPDLFFKYESAPS IKLSKRAGEPDSDEG  
GDLGIDMDADMHHDDNDQELFNNEHFTDAVPANVSVIAAIAAEQAAEASMMNVSAGEIGLTQMNAT  
CNNTVFEIGTEFEGAPSQVAKVIVPFAKRAKVIDMKNLKKSCNSLIQKQLLNAVPEETIPSHPKKKG EY  
YSKGFASFQQVYQKLPDLLTTKMSDSLSPSVAFYAVLHLANDLKLRLIPQEDLEDFQIRQVLD

>sp|Q564K3|CND2\_ARATH Condensin complex subunit 2 (Kleisin I $\gamma$ ) OS=Arabidopsis thaliana  
OX=3702 GN=CAPH PE=1 SV=1

MDESLTPNPKQKPASTTTTRIQAPTS PFFLGSNDDRLEREQARAARAAASRRRSVIFARGSQPETESD  
PCFDKQQILELFQNCIKLAS ENKINQKNTWELNLIDHLCEIIV EDENNTETNFQKASCTLEAGVKIYSM  
RVDSVHSEAYKVLGGITRAGHDDGGDHEDAAGAVENATNQKKQPEKKISPLSTLEPSFDALNVKKFD  
VAFVAVDPLYHQ TSAQFDEGGAKG LLLNNGVYGGCQVLFDSQEIPGKLVSSANKHDKSETIDLSFVK  
ECVEQMVLNMRKKDEIVPSLRAIINQFDEENQRPSDTFSCGQQTTE SFDISHGNDASYADDDEGYEN  
FGTSFDYEGQSGDV DENFGPNEAEPIYSNFHEEVEPASLQDMDSDDRLENVDDYLFLSLGISSKQNS  
WAGPDHWKYRKTGKPDVQ PASEIKSSPPAKKTRKKKQAEPELDFAKALEEEMPDI FAPPKNPKTLLL  
PASRTPCQTKLPEDCHYQ PENLIKLFLLPNVMCLGRRRRKNSGETSRQQPDDYEHGESWGN DNVY  
DDDDGPFDDNENDQSDAEDTNTLISQPRQVNKIDVQYDKASKQVDVQVLKETLWECLQESHQPPIQ  
DEEHQQEPPESRSFKVLLASFPDDCQAAERTQDISPHLCFICLLHLANEHNLSLIGSQNLDDLTIH LA

>sp|Q8BSP2|CNDH2\_MOUSE Condensin-2 complex subunit H2 (Kleisin I $\beta$ ) OS=Mus musculus  
OX=10090 GN=Ncaph2 PE=1 SV=1

MEDVEVRFHALLQPIRDLTKNWEVDVAAQLGEYLEELDQICISFDEGKTTMNFIEAALLIQGSACVYSK  
KVEYLVSQALDFISGKRRRAKQLSLVQEDGSKKTVNSETPCETENEFLSLDDFPDSRANVDLKN  
QASSELLIIPMLALVAPDEVEKNSSPLYSCQGDILASRKDFRMNTCMPNPRGCFMLDPVGMCPVE  
PVPVPEYPMSRSQKDPEDAEEQPMEVSRNGSPVVPDISQEPDGPALSGGEEDAEDGAEPLEVAL  
EPAEPRTSQSAILPRRYMLRERQGAPEPASRLQETPDPWQSLDPFDSLESKVFQKGPYSVPPGV  
EEAPGQKRKRKGATKLQDFHKWYLDAYAEHPDGRRARRKGPTEFADMEVLYWKHVKEQLETLQKLR  
RRKINERWLPGAKQDLWPTEEDRLEESLEDLGVADDFLEPEEYVEEPAGVMPEEAADLDAEAMPES  
LRYEELVRRNVELFIATSQKFIQETELSQRIRDWEDTIQPLLQEQEQHVFPDIHIYGDQLASRFPQLNE  
WCPFSELVAGQPAFEVCRSMLASLQLANDYTVETQQPGLEAAVDTMSLRLLTHQRAHTRFQTYAAP  
SMAQP

>sp|Q6IBW4|CNDH2\_HUMAN Condensin-2 complex subunit H2 (Kleisin II $\beta$ ) OS=Homo sapiens  
OX=9606 GN=NCAPH2 PE=1 SV=1

MEDVEARFAHLLQPIRDLTKNWEVDVAAQLGEYLEELDQICISFDEGKTTMNFIEAALLIQGSACVYSK  
KVEYLVSQALDFISGKRRRAKQLSSVQEDRANGVASSGVPQEAENEFLSLDDFPDSRTNVDLKN  
QTPSEVLIIPMLALVAPDEMEKNNNPLYSRQGEVLASRKDFRMNTCVPHPRGAFMLEPEGMSPME  
PAGVSPMPGTQKDTGRTEEQPMEVSVCRSPVPALGFSQEPGPSPEGPMPLGGGEDEDAEEAVELP  
EASAPKAALPKESRSPQQAALPRRYMLREREGAPEPASCVKETPDPWQSLDPFDSLESKPFKKG  
RPYSVPPCVVEALGQKRKRKGAALKQDFHQWYLAAYADHADSRLRRKGPSFADMEVLYWTHVKE  
QLETLRKLQRREVAEQWLRPAEEDHLEDLGAADDFLEPEEYMEPEGADPREAADLDAVPMSL  
SYEELVRRNVELFIATSQKQFVQETELSQRIRDWEDTVQPLLQEQEQHVFPDIHTYGDQLVSRFPQLNE  
WCPFAELVAGQPAFEVCRSMLASLQLANDYTVETQQPGLEMAVDTMSLRLLTHQRAHKRFQTYAA  
PSMAQP

>sp|Q9LUR0|CNDH2\_ARATH Condensin-2 complex subunit H2 (Kleisin II $\beta$ ) OS=Arabidopsis thaliana  
OX=3702 GN=CAPH2 PE=2 SV=1

MTSHGGGEVRGERIHTVQPERDLVANWEVDLSEKLEEYLLKICSGEITGNEEDGQIPVNFAEAALLQ  
GSVQVYSKVEYLNLVLRLEFLSKQRDQEQSKGTSNENEASSSRQVDEEENDLFWNVDDIPVDT  
KNRLDSSVGGDTCPSQFVKPPANLVVLEGDCLDTSGDGGELESYLLATTHLYRDFILLDPCDAVAVN  
EFLGDNYGGKGRNSAHRGSSVRKSFHSSVGRSGGSARKSSVGKNQGTNVHLSPICGNPNDQNC  
DQGSQPPVFEDNDHGFDMNEYGGAMDFSDTDAEDDPWKPLNPYEPGKLVKPFKVKILKIG  
WSITKDHMTSMFPLARPNGPISSELIEIWKMHGCASKDEQASQDIPYYEKLREMLVNGGNQPCGANG  
NYNDNDKDNHDEANNGDFHDFGEHDGDDAEHPFMDVDLNMNDGGAAEFHNYDGFENGESNCQ  
ESLEDLCRSHLDALLANIAKSEKQTDLAARVSTWKQKIEQNLEEQELHPPFDIQEYGDRIINKLTVES  
GNVETFTDLMKDQEKHEVARAFSALLQLVNNGDLDLEKPGNSTNEPMCYTAVKPFVSRLLKVHNRK  
NEKRGIHLPQKRAKSPITKGSHESPPPKRRNTCSVSSQTRKVSLSKISKINGVGVRCPTNSKKRRKGR  
SDDVTEVTEVASIEKSLGKL

>sp|P34341|KLE2\_CAEL Condensin-2 complex subunit kle-2 (Kleisin II $\beta$ ) OS=Caenorhabditis  
elegans OX=6239 GN=kle-2 PE=1 SV=2

MTRNAPPGQESTDLAWLVTPAKDLVENFSIDVLKALAGYLEVIRQESDNDQVDAATTYRLFDFQR  
ACRIIQGSCAVYGRKVDHVYELTISVVDLVENKQDDGNTGSRRGAGRRKNFNLGSTNYDLADIDSL  
KQEALANFEKTVKEEKSIDAVRMVENAEVIESQYERKSLVAKPTQFMFLNYGQLNRTDEQILNAK  
SRPDVIGKVKDFEIKKSKVKHDQQILYSHDCYRGNLDQFTLPGARWMPDNKELANFGVADLEVELD  
LEQEHEKISAYGPFKDPLSGREVPPPRWFIEQEAQRQNEIQSRATSRITIAAKTLRDSQGFSGSQP  
TRLSQPFVERHRQSNHLNDFLSFVEGRVKNRNPSTHLTTGLVDMFVDNFGSVMQNDEPNTSRRPDE  
NYAPMDFDDDFGGGDDDDDDYIRNLSRRDEKRAPAPWDELDKNHIIWYTGDENLPVSKPVKKITK  
FQPKPAEMLARKQRREEKINKSRDEFMETHDYLDYYYWRSARINPIKDWKIESLRTAILAEKKRR  
IKEKTAKIREARIQNMQRKRTARVIPVEQFEPVTEDIPTSNRRTLGAEYDDVDEDLAAEVELSMFGG  
GFDDDEEDVRPRGERPPMAPNNLEFDALQTFDIPPAEYVPLRFEDIDDAELNSVINLPGNLLIDKALP  
LLKKFAENRTDREQMAYEMAKAYEDVDVAVSTLQEHVDKWHSRMEPILEEGETRKEYDVHAVGRAV  
IGQYDIEGGTKRLLDLVMDRPWYEISRYFLSCLFMCNVGNVMVSEDMELPLEERINSMKITLLKRDH  
CEMFKEAGALDA

>tr|Q8INL2|Q8INL2\_DROME Chromosome associated protein H2, isoform E (Kleisin II $\beta$ )  
OS=Drosophila melanogaster OX=7227 GN=Cap-H2 PE=4 SV=2

MERILPEEAEAYLSEAREQILEIAKNRPGTQVAKCIRAYDEQQDLASLVVLEELSKNTDYSTDRLISL  
GYIEELLRHCLGRNDVSRSAIVAAGSALQYCGKIYGRVEYLCQVVEHQIEALLTSELQKETPSGS  
AAPEKNERRPEETRKRHPKCLTNKEVDPYLLTLEPKRFKTMSSDKRFNAAGFVKCTRNRTEIYLYQD  
HTPPNLWKHAPIVDPHPYDQDEKKQYKMFYHVEHRYNTLLPDIPFERLNLIKEYVHTNQVNTTEIL  
NEHMTTKEYLDEYIALENQMLAARYGAIVTRRRRLVDSARFMDNLEGLAKKMCMDKNLPMPTNE  
TVLIDQSLVDENSRSLTTAESTMGISQAENSTLKSSEVEATLSVSHIENSLSDSQEENPPLSSTLAINES  
SVLDSTRVDPIKDLTLEDELLIDSGISMEELSDIQMHTAGQSFDDGCVVLSLEDQRQLSPMLQMVSP  
SMEAKTLNIIEMDADLIMNVPREVSYPILLNVMGLPIKRLRRKCFKLPPEFDLFRQARLPIKREGQKKS  
PTTPRTLQIGREAPQNEREPGSPCSLEFDEDLNFLGFRQRRTFDSGFDIEEPRVSSCVSTIGEVKT  
ELEDEIEANTNLTASASDALNENVNDTKESGLGDSLAQELNASTEPNAENNTANSSQLEVTATESS  
GTLGLETVDLGMESALVSSVLDLSTEPSAMDSNIINVTQPDNSDLEISTVQDQDQTLHDEADANDLS  
AETPNPIADSAVDDCSLIRDWHRRLAPALEAAHERQNFNIKDLGTEILDICKAGNRTATLADVMADKDP  
SIMCRYMLASLVLTNHGNVSLDFENRDKSKPIDMSQFRMHLKSMKRMEINPEDDVGNINAAQSKSTP  
RSKQLNDSAHKPRSTTTASAPTKRKSANSLSEVFAKTVRLIQPIPKMWPTPSDADSGISSMGSSLAS  
TARLK

>PF3D7\_1304000 | Plasmodium falciparum 3D7 | condensin complex subunit 2, putative (Kleisin Iy) |  
protein | length=1024

MKKLGVNNAGENKGNISQNKDGTNKKTIEVNKNMRRLTFLNNESENDSIEGNKKNKYDKNKVKEINDVF  
KNCMVALSHNKICTRNAFDIHHIEHLEDLNLNDEEIPPEELNDEMIENGEFNLSFTRASKAIEGATKVYGY  
RVEAIYDQTYNFLTNNMLAKQFELDNMMDNKNITDPLNKRMRKRKLTLYLQESSTLAKSSDITVDSL  
SLSNISVDTFFLKLNSTYDHSQYKYLPLNLDLSIQFDGDDIDVCEYKRRKTLDDIGKDGKVKDE  
DGIHIMKNKNDNCDTYDKIICNNNDINKVDEKKNNDVDICENRNKKNESCNIYVDTFNVNEHKEFFDI  
YKKKFLNADILKEILYGGPDDFNSLHICPELDYFKEELKHKHLKRTDSKDTDDVDKEDGDGGLYND  
DIGNTDKNNIIFYDENLGCNMSNNMLMESIYNSDALNTDRKNIFPENLGMSCGNLNEEKNNNMNS  
SNNLNNCNYDNNDLYLGDYRMDLNIENVMQESLGFNDLNYSCDKNMNFSNNNGMLLQQSINMM  
DGMNPELIKSENKELDLGNTQINNEHYLLKNNYDIHKRHSIIEVPDDDTLWNRVMTFENRINAIDIN  
NELNYHYMPNKLMMMGNFRNLIDINKNVTNNNNNKSTILQNIIMQKMKYAFDVTSIDFENLYTEN  
NNIELSTYDLWKKEKKKYVSNALFCIDQTSYIFDTRENCVNCVNTVTDKVMKFSKFCVYPDFLHACNK  
NRNKHNNNNINKNHNMVILNEVNNNDNLNDIDPINQDDFNNDNFDMENMDDMNDGHLHEGLNEAI  
DKYYNMDFDNIWANNNDNKNNDNINNNNNLNSTYNNMNSHNNNNNNNNNNLSLFKKHNSFFNTALF  
QFNHSNTFGNVPFENVSKFVDVAKIKKILCDIVKPNEEQKSNTNDSLCEYQTEKDNQIVTYTAEKTTTF  
EEIVKETTAKLNESEASSTSIHMLFVCLLYTCNDQELLLEKIPNQNNFYVRYGLPVECHVNHDDIPMLK  
N

>PBANKA\_1402500 | Plasmodium berghei ANKA | condensin complex subunit 2, putative (Kleisin Iy) |  
protein | length=943

MKKLGVSNTNTNFTQIKGPDPIFKNPIEFNKNLRRLSFLNNDKEDLNKSEKNKVKEINDVFKNCMAAL  
SHNKICTRNAFDIRIHDHLEDLVNLNDEEINEELNDELLETGDFNLSFTRASKAIEGATKVYGYRVEAIYD  
QTYNFISNMNIAKKSETNDDVIDEKKHANEITNKKVKKRKLFFQESSTLAKPSDITIESVSVSNISVDTF  
FLKLNITYDHSAGISYLLPNLTLNNDLSIQFDGDDIDTCEYKMKKMFEEKLGKQNIERRNEKNCGSNDEL  
NDMLQKNESPVKVGVEYVTFNDNDKIMAREYKSKLYTNSDILREMFEGNEIEEFNNLNICPELDYFKEEI  
KNLKLKRSKSDKILDEDDIDNYNDDDTGLDKFSKKNELNLDGNMMSMDNLLGDMDGNNDDGNNEHM  
NDNANYGDNNKILESSFNNNLNFDDCNIDDLNIENVMQESMVFDMNMLNDSLNNNLNLSQNILSLHH  
NSNILGSSIPPELMKSENKDFSLINSFTGNFNFSSQNMLFKNQDKGSPSKPKNMLSIIIPDDDTLWNR  
QAISFENRLNAIDVNSKFNHYHYNPSKLMINGNFANLMSMAKVAFKNKQGPLNALTNNKLLKTSFDITYI  
NFENLYIEVNDVELSAYDLWNKEKKKYISNSLFAIDQTSYIFETKDNINCINCNTVIDRIMKFAFSPFIESQ  
NFNTDIKTNVILNEINNDYIGNDLQINNFERKQSENMFMDNMDDGQDYQMHEGLNDSIDKFYNMDF  
EDIWQENKNDITKFGSKNDNTSIFQLHQSMGHTNSLGSVIAPDNLPKFVDVSKIKILFNIVKPDENE  
ENVENGKSEENGKSEENGKSEENEENKNSDSSKQIVPYEGEKTTTTFSIINKTKTKLTESEVNGTSSI  
HMLFVCLLYTCNDQELLLEKIENEEDFYVHYGLPVEFHQKDDTRMLKN

>PY01534 | Plasmodium yoelii yoelii 17XNL | CCAAT-box DNA binding protein subunit B (Kleisin Iy) |  
protein | length=886

MKKLGVSNTKANANFTQIKGPDPIFKNPIEFNKNLRRLSFLNNDKEDLNKSEKNKVKEINDVFKNCMAA  
LSHNKICTRNAFDIRIHDHLEDLVNLNDEEINEELNDELLETGDFNLSFTRASKAIEGATKVYGYRVEAIY  
DQTYNFISNMNIAKKSDTNDVIDEKKHVNEITNKKMKRKLFFQESSTLAKPSDITIESVSVSNISVD  
TFFLKLNITYDHSAGISYLLPNLTLNNDLSIQFDGDDIDTCEYKMKKMFEEKLGKQNIERRNEKNLGSNDE

LNDMLQKNESPVKVG EYVTFNDNDKIMAREYKSKLYTNSDILREMFCGNEIEEFNNLNICPELDYFKE  
EIKNLKLRSDSKTLDDDEDIDNYNEDDDTGLDKFSKKNELNLNDENMSMDNLLGDMGNNNDCCNN  
ENMNDNGNYGDNNKILESSFNNNLNFDDCNIDDLNIENVMQESMAFDNMNLNDSLNNNLNLSQLML  
SLHHNSNILGGNIPLPELMKSENKDFSLINSFTGNFNFSSQNMLFKNQDKGSPSKPKHMLSIIPDDDTL  
WNRQAISFESRLNAIDVNSKFNHYHYNPSKLMINGNFSNLMSMAKAAFKNKQGPLNALANKLKTSTF  
DITDINFENLYIEVNDVELSVYDLWNKEKKKYISNSLFAIDQTSYIFETKDNINCVCNTVIDRIMKFA  
RSPFIESQNFNTDIKTNVILNEINNDYIGNDLQINNFERRQTENMFMDNMDDGQDYQMHEGLNDSIDK  
FYNMNFEDIWQENENKNDITKFGSKNDNTSIFQLHQSIGHANSLSVSVAPDNLPKFVDVSKIKKILFN  
IVKPDENEENAENENEENKKNSDSSKQIVPYEGEKTTFKNIINKDANFVNRAHELYICILYIYFLT

>PVX\_122040 | Plasmodium vivax Sal-1 | hypothetical protein, conserved (Kleisin Iy) | protein | length=928

MKKLGVNTKAGANLTRIKENENLFKKPIEFNKNLRRSLFLNNKNNDANQKDHQDKCDKTKVKEINDVF  
KNCMVALSHNKICTRNAFDIRIIDHLEDLVNLNDEEINEELNDEMLETGDFNLSFTRASKAIEGATKVVY  
YRVEAIYDQTYNFLSNMNIQSEVNEELVEEKKNANEISNRKIKRKLFLQESSTLAKSSDITMDSV  
TVSNISVDTFFLKLNSTYDHSSNSYLLPNLILNNDLSIQFDGIDACEYKRRKMEEEATEEGVDEDTA  
ATQTSKGFPPMIRSSSSYDNDCCSDAMVKCYKKKLFLHSDVLRDILFVAGNEDFNSLNICPELDYFKA  
EISKHKMKRSESKLEDEGEQGNDEDDDDDEEDDRRYAYNLNEEEHMSMHKGGDYGGERAKNNLAS  
SVGGNLTMDNLLDDCDFHNASVGDGRMLNSSVNNNSMHFNKYIEDLNIEENVMQESLAFDNMNLND  
SVGNLNYQSILSFQQGSNTMTGLPLPELMKSENKDFSLMNSLGGNFPLSTQNSLFFKNQGGSP  
RKGLISTIPDEDTLWNRNVMTFENRLNAIDVNNKFNHYHYYVPSKLMAHGNFRNLMDIAKGTHKNKHM  
VLQSVVQKKVKASFDVSLIDFENLYKEINDVELSTYDLWKKKYYVSNALFSIDQTSYIFETKDNINC  
VNTVTDRIKMFSAKPMIAPGDYCGDLKLNVLNEVNSDFVTNDMGQIHYGEGRNMESTFPENMDEH  
QDCHMQEGLNDAIDKFYNMDFDDIWDQNEHNSKQGSKNENASALQLRQRVSHGTTLGANMEN  
VAKFVDVSKIKKILCDIVKPAKEATGSEGAQRNDQIVPYVEEKTTFKDIIATKSKMNPEEVNGTSIH  
MLFVCLLYTCNDQELLEKIPNEDNFYVRYGLPVEYHVKPPDDMLLEN

>TGME49\_288930 | Toxoplasma gondii ME49 | hypothetical protein (Kleisin Iy) | protein | length=1185

MVARATDGGDTGAPAGSETHPVVRLGFRPDGKRRLSVVSGPASLSTGDGAPSGESRRGVGGTTGA  
SLAGHAPGALARQASSLNSASSSFSSFASSAFPASLPFSSSANRPGFARPTARAASGAGRALAGRL  
LVRAFFDDMKTVSMQRINQKNAFQVDLIDRLALVVHQQLVKTDNAVLTGTDGQAPALLDGASSPDL  
SSTSELSRTGRGEEGEEGIFTHVSSAVEGATRVYGYRVEAVYDQTYHVLNLMSSSRQGGGEDAG  
DGDAAAHPTRRGRHHQQLALFKKGGASTLAPASEITESQIEKDCVDPYFLKISGMFDQAGAKGLLLA  
NLEVDTSLRMKLDGECRAFPTGVLNRNGREKNAAREETEANHAPEETAEVAEPSVDCAFRLDLLAG  
ETPASVLALDICEKPIGHFRELLQSLRRGRDVKAGDALSEAEETNELDVDDDMLDVMQGTTLGDS  
GFQQATQEDEELLKIGESYMDDEAASGGLREVLEAQEAESREVTQDDELFGDGVDFFCDGHVGDAD  
DDRDGSWDRPRGEIRERDAEGERILYEVAADESSASSCTHPKSYSFDRLPVAFSQMLGVPAGGHGA  
QLAAKRAFLVPTAAGSQGGGDPGREGTRRRRGSGETSSSGCVDFPPLSAKGSAAAVGRPSAPS  
ARLTVKERQLRQEQFREMLDPFRVDMNSLDTKSGGLPLGSKFQCYVVPKQENVTVASDFTSSPFL  
HSPHLLVSLAMVPSKEIRLLRHTGPSVGDGWAPDGAGNSGGGRAGRDLGRGDSQAPDGPWEATFID  
AGDDGGLEDDSFWSAAAHGPLLKESALEAADAQAQTLLEGGGGLDRDWSDTAWAGGENDQASSYI  
AHLFERGDAASRGGAGLSLGDIVLLAEPQKVGVSSELRLSIPSRVYDVAVVKKALKTALGVVPDF  
SADQDAENSALRRKRKRDMLTAPGEEEPQEEEDVDSDCLDSVDGETKEPCRDALWNPGRRRDGDIF  
ETLCAETTRKLPSTEKANLSPQMLFVCLLYTCNEETLHLEQSADFSSSAFVHAPTDWHMRDDAEAVR  
VLDTVRHYPALPAVPEKKEKETSLEAPSAESAADDGGAAGDADDAQSPAKRRRGA LGDEERRQRR  
REGRGGKHHEGNRKGHRDEETGSKKRRGKRRKEDSDESSDGSDDDEEAAASEDRDGC

>cgd3\_3960 | Cryptosporidium parvum Iowa II | Condensin complex subunit 2 (Kleisin Iy) | protein | length=901

MARLSLHPRIFESEYSAETDNYLEENVSNLNKNGWGRKIQKSVLPNKRRSISIGQSRNDDSETTRLS  
RTSINLKGQIDQNKSFSSKSSSDQLPNEELDKLCNQCLNLLRQNKISSKNAFDILLIDHLNDIVNVQDSQ  
NEEEKSNIKKENKENVSKINNSKEKNIEIDKSKMNKGEFHNEISSSETTSQDTNFQKFQRAAVTLEA  
SARIYGYRVDSTFDNAYRILSNIKSGQILARNDSCEEDEKQDQEDDSSGNRLEESSKKKKYKRNLI  
FSGENNTIVSNPESITLKEFEKTKEMSEKPFVNFNLNDKVKIDNIRFGLDYNNIGSISMLMNNLELKD  
SLYNRDKSASLTFNISGRNNLINSNMFSCSTICKDELFKVNKTLDLLLPNPNENFGKDISNIVCPNLSR  
IFDSIQEITENYGDIKQVKDSTSIEEYQLNEQVIRFFFEFTDPSFENDSLESENFLKKHSQSMDDIEY  
VNEQDLEFLNNFEEEEKVELNMGLQDFQMHVERVIKDLNKTESSEHILEDLDQNKDIEIEKKSGEFKFS

KIGDVLDFLAKKSTKSLEFFNERKKGKESNSVFGQKLRSKSENTNFEIPSPLLTNNIFNGIEWMNNLPK  
IKQTQINSSRSKTKNLSSNKLFVKGKSTTSIFNYNLNHLFCLANLTGVKINLRSIHKAEENSEETAGQNYI  
TNDILIKTNNQSHINKNILNNSMSEQTDLMVNHCEIEDLMQVESYLQPLSQEEFSIDNGKDILIQSKLLLP  
FDEDKISDITDILLEKSSKSLHVRDEYNSSLKFSKSSNHVVIDLIKNVLKNISIQILQSDDSNSLTLFNIINQS  
RKLQDGLNSVSTGIFFICILHICNENNYSLNLSQDQANSDSPIELNSENIVHIMLNLNSSVDLQK

>ETH\_00039510 | Eimeria tenella strain Houghton | Ccaat-box DNA binding protein subunit B, related,  
related (Kleisin I $\gamma$ ) | protein | length=122

GFDEEEPLEAAAAAAERVSFCHLSSAIEGATKVYGYRVEAVYDQTYHLLNGLSSLKNSSNGVEDDE  
EQQQQQQQGSKRKQRQQQQQLALFFKGGSSTLADPQDILNEQQDTGVLIDPFFV

>BBOV\_I002180 | Babesia bovis T2Bo | hypothetical protein (Kleisin I $\gamma$ ) | protein | length=726

MASRKRSRDVDSSEISEAPQPVSQKVTGSPGNTQDLLTLFTDCMSALSTNKICSRNAFEVGIIDHMTD  
LVHLDDGSVDDVVPELLPEDTSSGASRRLNFRASKVVESASKIYGYRIEAIYDQTFNVLMSMNSANQ  
ADGTSGSTSATKPRGRHRVKIDLTSSRTLAPSEVTLTEIPMDNVILDYFLKISSMFDHSGAMGLLLI  
NLQVTDLSDLDGDSLVFPPRARSEHDDSNVILSRDAVKKCFGNTPEKRMELPEAAFRQELER  
LREMRRRKECGDVIASDSDGEINPEPESEKHIDFFKVRQPIAPIEDSLEPMDAMGHIDDVPEDTVHDMPI  
SGTTPDGTGSDTGSVPNSTGIALRQLAEIDLIGGSQFSYYTSVPVKTHVPSSKNKGSDEPDDTNLKT  
QRPVKSQRNITNDLESYLRNIDLEEKIASVELSTVFTTPKAVGKKAPSTFAASDFTGAIYRFNDTFLTRL  
GLLGNRCLRFVSDHEWRNGPNTDSSVPILQVHYCADIDAPYSTMRISENFSWRLDEQVGLLEDDDM  
WNASNDFEDPELPLTQDGPVVANIESMYESEPGEPLLALSQHADPAAISQWPREGAIVPAPVAAYVDI  
FKIKKTLCGVIVPPPAFHEALEDKQQIDKEHSGGNTQSEYSCGFQDAVTDTVSRLMDSVAALTSHIL  
FVCLLHVCNEQDLLLLKQSRPLEDFVICAGAPKEQHLGDVQGS

>PBANKA\_030180 | Plasmodium berghei ANKA | condensin-2 complex subunit H2, putative (Kleisin  
II $\beta$ ) | protein | length=775

MSTQEDEVRLLIQNQLKCNNTNECINFDLASTIQEFLNSLDKNSFEDIDKTIRENEKDKDLMNSFTSAI  
FLENCVKILGLKIEHLHNLAHNTLYNIYKENKNSNSNKKQLLIIDEEYLYINEIKNLKNTITENDIIEEDLL  
VKTIPLPTFLFDHIRVKNKTENHNKIYDEKDNFLINKKLLNEPDIEINIPYIDTLGNESINSIETKIMDLN  
STNSYKNMDNLNLIDNKQTIEISSVNSLNFDFKLENDGIILLDINDYNIFINDEYDFTLQKNSTILFEKY  
EFFSRNSIYLSNNLTEYIHEQNTIQHTYKINNIYDITSLRLCTDTLLFKTDFYSYDIALDIKNKNYLINKFE  
RQKKKLYILDETIHKDHKYNTIYKQADYCYCGSIITSIENPNPNNRCIYCNNTQIDRNEKNGLYKLL  
PGYYNLSCYNITETEDFLTYMQPNKIIDIIMKNEINDINLDSNSTTNKFEENIIDPIFQNNDFTDKGDNY  
RLSNDQKLFQIKIPSLYIQLGLNIDYIYLEPLIYNLIKNLKKEKNVDRFFSINFYDHNENYDIEILKDDY  
YHEIKDEQNKTIQETLNMDTFINIKSIDNHVKNFPTSILKKTDSNTSLVFSFEDKIQDRVNAWSNFLEEK  
LVILKRQPQYNVEYKILKYIINNGDNIYFPDLIKNDEKYQIYRNFLTTLMLINTNKNLISEIDQQKHSN  
NITNYQINIKNINVNEYMNISAFDNTKFTINDKKRKITEKSDNIDNSFHLEKKNHI

>PFB0185w | Plasmodium falciparum 3D7 | condensin-2 complex subunit H2, putative (Kleisin II $\beta$ ) |  
protein | length=797

MSTTDELNLLIQNLQKCNNTNECINFDLSSTIQGFLNCLDRNVLENIDKGLGENEYEKEVVDNFTSAI  
FVENCVKIFSQKIEHLHNLAHNTLYNIYKENKHNSSSKKNQLIMSDEEYLYINEIKNMKNTQHDNDIIE  
DDILIKTIPPTFLFSDNIKTKDINEDKRKTNFNNEEDKEKDNKNKDNDIDAINFEITDNNVNTLNF  
EKIFIENDGILLLDINDYNVFIDDPYNSIQKNSTILFEKYDFFSRRSTYLSSTLSKYVVENKNMDHIY  
KLYNHITDIINKNICFDIFLFKQDFDYDFSLGILKNKKSILNFKKQQKQLHPLEENTHMDTHHINNNHH  
LQKYDLNRPLPNYYMLHCYNIKNYQDFFRYMQPNYILEIMKRHIIEIYNTNQQERAIQKEAYEYIYNEQT  
KKKNDHKENNNIDVPKYKDNKCYDSPFYNYISNIIQFDHLIDDDMIYFDEYFYKSLILYNTNINDLHK  
NTNNNQTNDETNIINNMKDEKQKNIISNINNFSDQKLFNQIKPELYIQLGLNFSYHLEPLIYNIK  
TLKKKNDFEKFFSVNLFDDKPIYEFDILRDDEYDEQKNEDNKNHIEENINFENITDKNILNDEMNIPIAI  
FENDHLDNTFIMNDDQELQDRVSKWNAFLEEKLEILKRQPKYDLDLKKNIIYNTINNGENILFTKLIK  
KDKFEISRNFLLMLINADILNIKKINKHKSNNISYIEIHKENLQQYLSISKQVQNKSFILKEKRRK  
NKQHLTNGMKDTSKQKQKI

>PVX\_003630 | Plasmodium vivax Sal-1 | hypothetical protein (Kleisin II $\beta$ ) | protein | length=784

MSTPDELTAIQNLQKCNNTSEINFDLASTIQEFLNCLDRNVLEELEGGAHEGEKERESDREREKEG  
EREREQDVANSFTSAIFVENCVKIFGLKIEHLHNLAHNTLYNIYRENKHSNAGKKHMVMSDEEYLF

NEVKNLKSCPGESEPCMEEDLLVKTIPLPTFLFSENVKKKEGAAEVDSELGIDLSADLDTPRRSDNGS  
GTDDRRGHSNLSKESEEAAREANGETDSIASSPAWRKGENDRLTEEAEVLEQNSLKPLNFDKMYL  
ENDGILLLDINDYNVFINDEYDMSILNQNSSMLFEKYDFSCSRHSTYLSANLTKYIEREKTVDIYRTY  
HFNDILSDDLCSVDVFLFKSDFSHYDLALGIIKSKKYLLSRFKEQKKYLYVLDENAHMDKDRVGTSTIEK  
NDIKRKLPHYYMLNCQNIKRAQDFFTYMQPSQIIDIITRNARRRYLSCLPSGETSQGGQSGNAAGADS  
PVGGAASHTSPPATPAPPPPGRSTDQKLFEQIKIPDIYVQKLGLNFRYYHLEPLIYNLIKELKKKKNVEK  
YFSLNLFDEQNNYDFDILQDEEYADEQNEGNAAAEGEGLTNDENFLDVRSNLNGDMVGGMMGGMMG  
GMMDDIPLDVFEKKDSSDAFFASFDEDIHDRVNKWNAFLEEKQLQLLRSHPKYDQYKKNIIHHTLNS  
GAKTPLCNLIKDREPYQVCRNFLTTLMLINTNMLQISEVNQHSQSNDVSNYQINVKKENVQEYLGSSK  
RFKNASFAIKDKKRKTASKGGTRNAKPAKKKPHKD

>PY01684 | Plasmodium yoelii yoelii 17XNL | hypothetical protein (Kleisin II $\beta$ ) | protein | length=773

MSTQEDEVRLLIQNLQKCNNTNECINFDLASTIQEFLNSLDKNSFEDIDKTIRENEKDKDLMNSFTSAAI  
FLENCVKILGLKIEHLHNLAAXNTXYNIYKENKNNNSNKKQLLIIDEEYLYINEIKNLKNTITENDIIEEDLLIK  
TIPLPTFLFTDHIKVKNKIDNHKNIKNDEKDNSLLNKKKLNKSDIENIPYIDTLENESITSIQKNVMDLNS  
EYSYQNMDNMDNMNSMENKQTLISSVNSLNFDFKLFLENDGIILLDINDYNIFINDEYDFTLQKNKSTIL  
FEKYEFFSRNSIYLSNNLSEYIYEQNTIQHTYKINNIYDITSLRLCTDTLLFKTDFYSYDLALDVIKKNKYLI  
NKFERQKNKLYILDETHKNHKYNTIYKQANANYCDYCGSIIEPNESNNHCIYCNNNNEKNGFYKKLPG  
YYNLSCYNITETQDFLYMQPNKIIDIIMQNEINDTNLDANSTTNKLDQNIIDPIFHENNDSSDKSDDQKL  
PNDPKLTNDQKLFKQIKIPPLYIQKGLNIDYYYLEPLLYNLIKSLKKEKNVDRFFSINFYDHNENYDTEIL  
KDDDYQEIKDEQNKTQETLTMGTFINIKSIDNHVKNLPTSILKKTDSNTSLAFSFEKIQDRVNKWRNF  
LEKKLDILKRQPPYNVEYKKKILKYMISNGDNIFPDLVNDNEKYKIYRNFLTTLMLINTNKLDATEIEQN  
NSNNITNYKINVKNMNVNEYINFPNSFDNIKFTINDKRRKITQNFNKNDSLYLQKKHHI
